# Supplementary material
Source: Springer Nature journal article supplement (https://www.springermedizin.de/resource/supplementary/13053_2014_469_MOESM1_ESM.pdf/9673882)

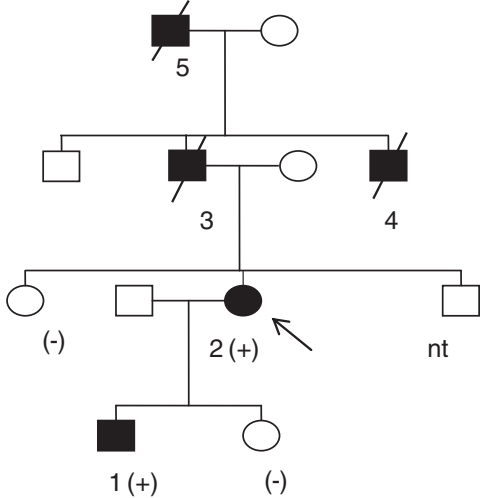

(+) Del Ex 1 *vhl* + *C3ORF10*

(-) nodel

nt – not tested

Supplement: MOESM1 [file 9673882]
